# Supplementary material for: Recurrence Patterns for Pancreatic Ductal Adenocarcinoma after Upfront Resection Versus Resection Following Neoadjuvant Therapy: A Comprehensive Meta-Analysis
Source: PubMed Central journal article supplement (PMC7408905; doi:10.3390/jcm9072132), 2020-07-06
Supplement: jcm-09-02132-s001.pdf [file jcm-09-02132-s001.pdf]

## Supplementary material

**Table S1.** Patient characteristics among all studies included within the meta-analysis.

| Author                           | Age (years)*              |                           | Male (n) |     | Head of Pancreas Tumor (n) |     | Distant Metastases |    |
|----------------------------------|---------------------------|---------------------------|----------|-----|----------------------------|-----|--------------------|----|
|                                  | NAT                       | US                        | NAT      | US  | NAT                        | US  | NAT                | US |
| Versteijne et al <sup>26</sup>   | 66 (59-71)                | 67 (60-73)                | 64       | 74  | 97                         | 117 | -                  | -  |
| Lof et al <sup>1</sup>           | 63 ± 9.5 <sup>α</sup>     | 65 ± 10.8 <sup>α</sup>    | 47       | 51  | 0                          | 0   | -                  | -  |
| Yoshiya et al <sup>2</sup>       | 67.0±7.3                  | 68.8±10.6                 | 9        | 4   | 0                          | 0   | 0                  | 0  |
| Groot et al <sup>3</sup>         | 62.7±9.4                  | 65.8±10.5                 | 128      | 501 | -                          | -   | -                  | -  |
| Nagakawa et al <sup>4</sup>      | -                         | -                         | 136      | 161 | 245                        | 245 | -                  | -  |
| Nurmi et al <sup>5</sup>         | 65 (40,83)                | 66 (45,82)                | 33       | 67  | -                          | -   | -                  | -  |
| Jang et al <sup>6</sup>          | 59.4±8.4                  | 58.9±11.3                 | 17       | 15  | 23                         | 17  | 0                  | 0  |
| Chen et al <sup>7</sup>          | -                         | -                         | 52       | 52  | 70                         | 70  | 8                  | 7  |
| Masui et al <sup>8</sup>         | 63 (43,73)                | 66 (56,80)                | 8        | 6   | 13                         | 13  | 0                  | 0  |
| Ferrone et al <sup>9</sup>       | -                         | -                         | 21       | 45  | -                          | -   | -                  | -  |
| Fujii et al <sup>10</sup>        | 66 (45,76)                | 63 (42,82)                | 10       | 41  | -                          | -   | -                  | -  |
| Ishikawa et al <sup>11</sup>     | -                         | -                         | -        | -   | -                          | -   | 0                  | 0  |
| Golcher et al <sup>12</sup>      | 62.5 (33,76)              | 65.1 (46,73)              | 17       | 18  | 33                         | 33  | 2                  | 0  |
| Papavasiliou et al <sup>13</sup> | 66 (38,84)                | 67 (35,91)                | 64       | 83  | 108                        | 201 | -                  | -  |
| Cho et al <sup>14</sup>          | 59.57±8.57                | 60.76±10.79               | 16       | 10  | 26                         | 18  | 0                  | 0  |
| Jiang et al <sup>15</sup>        | 45.9±9.8                  | 45.5±9.3                  | 75       | 69  | 98                         | 96  | -                  | -  |
| Kang et al <sup>16</sup>         | 59.3±9.1                  | 62.1±9.1                  | 14       | 63  | 12                         | 48  | -                  | -  |
| Tajima et al <sup>17</sup>       | 62.6 (51,77) <sup>β</sup> | 66.0 (52,80) <sup>β</sup> | 7        | 14  | 9                          | 11  | -                  | -  |
| Barugola et al <sup>18</sup>     | 59 (50,68)                | 64 (56,70)                | 21       | 202 | 39                         | 291 | 0                  | 0  |
| Katz et al <sup>19</sup>         | 64.8<br>(34.5,85.4)       | 65.1<br>(24.9,84.5)       | 79       | 24  | 147                        | 47  | -                  | -  |
| Barbier et al <sup>20</sup>      | 65 (39,81)                | 64 (37,79)                | -        | -   | 38                         | 67  | -                  | -  |
| Sahora et al <sup>21</sup>       | -                         | -                         | 17       | -   | 26                         | -   | 0                  | -  |
| Greer et al <sup>22</sup>        | -                         | -                         | -        | -   | -                          | -   | -                  | -  |
| Massucco et al <sup>23</sup>     | 62.7±5.6                  | 66.5±8.7                  | 16       | 20  | 23                         | 41  | -                  | -  |
| Moutardier et al <sup>24</sup>   | 65 (39,76)                | 65 (50,80)                | 24       | 9   | 39                         | 17  | 0                  | 0  |
| Pingpank et al <sup>25</sup>     | 68 (41,80)                | 67 (41,85)                | 18       | 21  | 53                         | 47  | -                  | -  |

The baseline characteristics are reported for all patients undergoing NAT irrespective of subsequent resection. PDAC Pancreatic duct adenocarcinoma; NAT Neoadjuvant therapy; US Upfront surgery; \* Expressed as Mean ± Standard deviation or Median (Range); <sup>β</sup> Mean (Range); <sup>α</sup> Median and interquartile range; - Not reported.

**Table S2.** Pathological outcomes in all studies within the meta-analysis.

| Author                         | Poor Tumor Differentiation |     | N0 Nodal Status (n) |     | Tumour Size (mm)*          |                            | Perineural invasion (n) |     | Lymphovascular invasion (n) |                | R0 resection (n) |     |
|--------------------------------|----------------------------|-----|---------------------|-----|----------------------------|----------------------------|-------------------------|-----|-----------------------------|----------------|------------------|-----|
|                                | NAT                        | US  | NAT                 | US  | NAT                        | US                         | NAT                     | US  | NAT                         | US             | NAT              | US  |
| Versteijne et al <sup>26</sup> | -                          | -   | 48                  | 20  | -                          | -                          | 28                      | 67  | 14                          | 33             | 51               | 37  |
| Lof et al <sup>1</sup>         | -                          | -   | 45                  | 31  | -                          | -                          | 70                      | 80  | 45                          | 66             | 59               | 64  |
| Yoshiya et al <sup>2</sup>     | -                          | -   | 8                   | 6   | 41.3±20.0                  | 42.7±18.6                  | -                       | -   | 5 <sup>±</sup>              | 8 <sup>±</sup> | 9                | 6   |
| Groot et al <sup>3</sup>       | 69                         | 366 | 91                  | 719 | 25±15                      | 32±15                      | 133                     | 859 | 91                          | 544            | 180              | 658 |
| Nagakawa et al <sup>4</sup>    | -                          | -   | 126                 | 220 | -                          | -                          | -                       | -   | 133                         | 84             | 191              | 195 |
| Nurmi et al <sup>5</sup>       | 14                         | 26  | 36                  | 108 | 25<br>(20,30) <sup>γ</sup> | 30<br>(25,40) <sup>γ</sup> | 47                      | 120 | 16                          | 58             | 58               | 106 |
| Jang et al <sup>6</sup>        | -                          | -   | 10                  | 15  | 34±08                      | 35±9                       | -                       | -   | 27                          | 23             | 14               | 6   |
| Chen et al <sup>7</sup>        | 41                         | 42  | 44                  | 45  | -                          | -                          | -                       | -   | -                           | -              | -                | -   |
| Masui et al <sup>8</sup>       | 5                          | 5   | 10                  | 14  | 33<br>(18,50)              | 32<br>(17,75)              | 2                       | 4   | 9                           | 7              | 12               | 10  |
| Ferrone et al <sup>9</sup>     | -                          | -   | 14                  | 69  | 25 (1,55)                  | 32<br>(15,107)             | 29                      | 83  | 14                          | 61             | 35               | 75  |
| Fujii et al <sup>10</sup>      | 5                          | 9   | 3                   | 46  | 29<br>(12,40)              | 30<br>(20,60)              | 3                       | 24  | 8                           | 36             | 0                | 30  |

|                                  |    |     |    |     |                              |                              |    |     |    |    |     |     |
|----------------------------------|----|-----|----|-----|------------------------------|------------------------------|----|-----|----|----|-----|-----|
| Ishikawa et al <sup>11</sup>     | -  | -   | 17 | 167 | -                            | -                            | -  | -   | -  | -  | -   | -   |
| Golcher et al <sup>12</sup>      | -  | -   | 11 | 3   | -                            | -                            | -  | -   | -  | -  | 17  | 16  |
| Papavasiliou et al <sup>13</sup> | 30 | 70  | 36 | 158 | 25<br>(0,105)                | 30<br>(10,85)                | 44 | 121 | -  | -  | 74  | 126 |
| Cho et al <sup>14</sup>          | -  | -   | 9  | 9   | 16.5±9.2                     | 26.9±6.4                     | -  | -   | 13 | 8  | 29  | 20  |
| Jiang et al <sup>15</sup>        | 23 | 25  | -  | -   | 32±13                        | 35±08                        | -  | -   | -  | -  | 95  | 96  |
| Kang et al <sup>16</sup>         | 3  | 7   | 10 | 55  | -                            | -                            | 10 | 46  | 4  | 20 | 28  | 92  |
| Tajima et al <sup>17</sup>       | -  | -   | 10 | 12  | 30.1<br>(16,55) <sup>β</sup> | 30.6<br>(17,53) <sup>β</sup> | 13 | 19  | 11 | 19 | 11  | 18  |
| Barugola et al <sup>18</sup>     | 3  | 115 | 13 | 312 | 20<br>(15,30) <sup>¥</sup>   | 25<br>(20,30) <sup>¥</sup>   | -  | -   | -  | -  | 29  | 216 |
| Katz et al <sup>19</sup>         | 27 | 6   | 75 | 41  | 24 (3,80)                    | 30<br>(13,55)                | -  | -   | -  | -  | 138 | 41  |
| Barbier et al <sup>20</sup>      | -  | -   | -  | -   | -                            | -                            | -  | -   | -  | -  | -   | -   |
| Sahora et al <sup>21</sup>       | -  | -   | -  | -   | 15 (0,80)                    | 30 (8,80)                    | 10 | 56  | 4  | 47 | 35  | 45  |
| Greer et al <sup>22</sup>        | 3  | -   | 9  | -   | -                            | -                            | -  | -   | -  | -  | 9   | -   |
| Massucco et al <sup>23</sup>     | -  | -   | -  | -   | -                            | -                            | -  | -   | -  | -  | 31  | -   |
| Moutardier et al <sup>24</sup>   | 3  | 18  | 2  | 36  | -                            | -                            | 3  | 25  | -  | -  | 7   | 30  |
| Pingpank et al <sup>25</sup>     | 5  | -   | 3  | 11  | 32<br>(12,44)                | 31<br>(15,55)                | -  | -   | -  | -  | 21  | 11  |
| Yoshiya et al <sup>2</sup>       | -  | -   | -  | -   | 25<br>(20,55)                | 40<br>(15,50)                | -  | -   | -  | -  | 27  | 11  |

Pathological outcomes are provided for patients undergoing resection. NAT Neoadjuvant therapy; US Upfront surgery; \* Expressed as Mean ± Standard deviation or Median (Range); <sup>β</sup> Mean (Range); <sup>¥</sup> Median (Inter-quartile range); ± Included only vascular invasion; - Not reported.

**Table S3.** Resectability and Neoadjuvant therapy of all patients who underwent resection included in the quantitative analysis within this meta-analysis.

| Author                         | Preoperative Tumor Resectability (n) |          | Type of NAT (n)* |                 |                |                  |                   |             | Preoperative Radiotherapy (n) |
|--------------------------------|--------------------------------------|----------|------------------|-----------------|----------------|------------------|-------------------|-------------|-------------------------------|
|                                | NA T                                 | US       | Gem-citabine     | Plant Alkaloids | Platinum based | Folfirinox       | Fluoropyrimidines | Combination |                               |
| Versteijne et al <sup>26</sup> | -                                    | -        | 72               | -               | -              | -                | -                 | 0           | 72                            |
| Lof et al <sup>1</sup>         | -                                    | -        | -                | -               | -              | -                | -                 | -           | -                             |
| Yoshiya et al <sup>2</sup>     | BR (8)<br>UR (3)<br>BR (138)         | BR (9)   | 11 <sup>α</sup>  | 7 <sup>±</sup>  | -              | -                | 3 <sup>±</sup>    | 10          | -                             |
| Groot et al <sup>3</sup>       | LA (93)                              | -        | 133 <sup>ε</sup> | -               | -              | 142 <sup>ε</sup> | -                 | 44          | 180                           |
| Nagakawa et al <sup>4</sup>    | BR (223)                             | BR (277) | -                | -               | -              | -                | -                 | -           | -                             |
| Nurmi et al <sup>5</sup>       | BR (75)                              | BR (150) | 75 <sup>β</sup>  | -               | -              | -                | -                 | 75          | -                             |
| Jang et al <sup>6</sup>        | BR (17)                              | BR (18)  | 17               | -               | -              | -                | -                 | 0           | 17                            |
| Chen et al <sup>7</sup>        | LA (98)                              | La (98)  | -                | -               | -              | -                | -                 | -           | -                             |

|                                  |            |            |                       |                 |                 |    |                       |    |     |
|----------------------------------|------------|------------|-----------------------|-----------------|-----------------|----|-----------------------|----|-----|
| Masui et al <sup>8</sup>         | BR<br>(15) | BR<br>(19) | 15 <sup>¥</sup>       | -               | -               | -  | <b>15<sup>¥</sup></b> | 15 | -   |
| Ferrone et al <sup>9</sup>       | BR<br>(9)  | R<br>(87)  | -                     | -               | -               | 40 | -                     | 0  | -   |
| Fujii et al <sup>10</sup>        | LA<br>(19) | R<br>(12)  | -                     | -               | -               | -  | 18                    | 0  | 33  |
| Ishikawa et al <sup>11</sup>     | BR<br>(18) | BR<br>(50) | -                     | -               | -               | -  | -                     | 0  | 112 |
| Golcher et al <sup>12</sup>      | -          | -          | 112                   | -               | -               | -  | -                     | 0  | 112 |
| Papavasiliou et al <sup>13</sup> | R<br>(33)  | R<br>(33)  | <b>33<sup>¥</sup></b> | -               | -               | -  | 33 <sup>¥</sup>       | 33 | -   |
| Cho et al <sup>14</sup>          | -          | -          | 85                    | -               | -               | -  | 23                    | 0  | 108 |
| Jiang et al <sup>15</sup>        | BR<br>(30) | BR<br>(21) | 30                    | -               | -               | -  | -                     | 0  | 30  |
| Kang et al <sup>16</sup>         | -          | -          | <b>43<sup>Ω</sup></b> | -               | 8 <sup>±</sup>  | -  | 38                    | 8  | 0   |
| Tajima et al <sup>17</sup>       | BR<br>(32) | R<br>(104) | 32                    | -               | -               | -  | -                     | 0  | 32  |
| Barugola et al <sup>18</sup>     | R<br>(13)  | R<br>(21)  | 13 <sup>¥</sup>       | -               | -               | -  | <b>13<sup>¥</sup></b> | 13 | -   |
| Katz et al <sup>19</sup>         | BR<br>(27) | R<br>(362) | <b>41<sup>£</sup></b> | -               | 10 <sup>±</sup> | -  | 9 <sup>±</sup>        | 19 | 24  |
| Barbier et al <sup>20</sup>      | LA<br>(14) | R<br>(41)  | 81                    | -               | -               | -  | 64                    | 0  | 145 |
| Sahora et al <sup>21</sup>       | R<br>(106) | R<br>(46)  | -                     | -               | 38 <sup>¥</sup> | -  | <b>38<sup>¥</sup></b> | 38 | 38  |
| Greer et al <sup>22</sup>        | -          | -          | -                     | -               | 13 <sup>¥</sup> | -  | -                     | 13 | -   |
| Massucco et al <sup>23</sup>     | BR<br>(20) | BR<br>(8)  | <b>37</b>             | 16 <sup>±</sup> | 5 <sup>¥</sup>  | -  | 5 <sup>¥</sup>        | 21 | 42  |
| Moutardier et al <sup>24</sup>   | UR<br>(6)  | UR<br>(1)  | 8                     | -               | -               | -  | -                     | 0  | 8   |
| Pingpank et al <sup>25</sup>     | R<br>(16)  | R<br>(32)  | -                     | -               | 23 <sup>¥</sup> | -  | <b>23<sup>¥</sup></b> | 23 | 23  |
|                                  | BR<br>(7)  | R<br>(44)  | -                     | -               | -               | -  | -                     | -  | 24  |

Pathological Resectability and Neoadjuvant therapy are provided for patients undergoing resection. NAT Neoadjuvant therapy; US Upfront surgery; BR Borderline Resectable; Locally Advanced; UR Unresectable; R Resectable; FU Fluorouracil based therapy (including S-1 and 5-FU); \* The total number receiving this NAT including combination therapies so this will not add up to the total NAT cohort population as combination therapy is entered into multiple NAT columns; ¥ In combination with each other in the corresponding row; ± In combination with Gemcitabine; £ n=44 were in combination with Gemcitabine and Folfirinox; β in combination with an unreported agent; α Gemcitabine alone in 1 patient; £ Gemcitabine alone in 22 patients; Ω Gemcitabine alone in 35 patients; - Not reported; **BOLD** indicates the base NAT if in combination.

**Table S4.** Results of the mixed-effects meta-regression to identify potential predictors of overall recurrence in the A) neoadjuvant therapy (NAT) and B) up-front surgery (US) groups. Variables were included in the mixed effects model if they were significantly different between NAT and US, where differences were identified on meta-analysis and with an incidence of  $\geq$  three for categorical variables.

| Variable                           | Estimate | Standard Error | P Value | 95% Confidence Interval |
|------------------------------------|----------|----------------|---------|-------------------------|
| Borderline Resectable tumor status | 0.1190   | 0.0305         | 0.030   | 0.022, 0.216            |
| R0 resection                       | -0.258   | 0.096          | 0.074   | -0.562, 0.046           |
| N0 nodal status                    | -0.729   | 0.084          | 0.003   | -0.996, -0.461          |
| Perineural Invasion                | 0.002    | 0.0004         | 0.008   | 0.001, 0.003            |

A) NAT.

| Variable                           | Estimate | Standard Error | P Value | 95% Confidence Interval |
|------------------------------------|----------|----------------|---------|-------------------------|
| Borderline Resectable tumor status | 0.075    | 0.050          | 0.166   | -0.038, 0.188           |
| Resectable tumor status            | -0.210   | 0.050          | 0.002   | -0.323, -0.098          |
| R0 resection                       | 0.098    | 0.067          | 0.178   | -0.054, 0.251           |
| N0 nodal status                    | -0.047   | 0.059          | 0.448   | -0.181, 0.087           |
| Perineural Invasion                | 0.045    | 0.052          | 0.416   | -0.074, 0.163           |

B) US.

**Table S5.** A) The MINORS criteria<sup>27</sup> scores for all non-randomised studies included in the review and B) Cochran's Risk of bias tool for randomised trials.

| Author                           | Item /2 |   |   |   |   |   |   |   |   |    |    |    | Total /24 |
|----------------------------------|---------|---|---|---|---|---|---|---|---|----|----|----|-----------|
|                                  | 1       | 2 | 3 | 4 | 5 | 6 | 7 | 8 | 9 | 10 | 11 | 12 |           |
| Lof et al <sup>1</sup>           | 2       | 2 | 0 | 2 | 0 | 2 | 0 | 0 | 2 | 2  | 1  | 2  | 15        |
| Yoshiya et al <sup>2</sup>       | 2       | 1 | 0 | 2 | 0 | 2 | 0 | 0 | 1 | 2  | 0  | 1  | 11        |
| Groot et al <sup>3</sup>         | 2       | 1 | 0 | 2 | 0 | 1 | 1 | 0 | 1 | 0  | 0  | 2  | 10        |
| Nagakawa et al <sup>4</sup>      | 1       | 2 | 2 | 2 | 0 | 2 | 0 | 0 | 2 | 2  | 1  | 2  | 16        |
| Nurmi et al <sup>5</sup>         | 2       | 1 | 0 | 2 | 0 | 2 | 2 | 0 | 2 | 1  | 1  | 2  | 15        |
| Chen et al <sup>7</sup>          | 1       | 1 | 0 | 2 | 0 | 2 | 0 | 0 | 2 | 1  | 1  | 1  | 11        |
| Masui et al <sup>8</sup>         | 2       | 2 | 2 | 2 | 0 | 2 | 1 | 0 | 2 | 2  | 2  | 2  | 19        |
| Ferrone et al <sup>9</sup>       | 2       | 2 | 0 | 2 | 0 | 1 | 0 | 0 | 1 | 2  | 0  | 2  | 12        |
| Fujii et al <sup>10</sup>        | 2       | 1 | 0 | 2 | 0 | 1 | 0 | 0 | 1 | 2  | 0  | 2  | 11        |
| Ishikawa et al <sup>11</sup>     | 2       | 1 | 0 | 1 | 0 | 2 | 0 | 0 | 2 | 2  | 0  | 2  | 12        |
| Papavasiliou et al <sup>13</sup> | 1       | 2 | 0 | 2 | 0 | 2 | 0 | 0 | 2 | 2  | 0  | 2  | 13        |
| Cho et al <sup>14</sup>          | 2       | 2 | 0 | 2 | 0 | 2 | 0 | 0 | 2 | 2  | 1  | 2  | 15        |
| Jiang et al <sup>15</sup>        | 1       | 2 | 0 | 2 | 0 | 2 | 0 | 0 | 1 | 2  | 2  | 2  | 14        |
| Kang et al <sup>16</sup>         | 1       | 2 | 0 | 1 | 0 | 2 | 0 | 0 | 2 | 2  | 0  | 2  | 12        |
| Tajima et al <sup>17</sup>       | 1       | 2 | 0 | 1 | 0 | 1 | 0 | 0 | 1 | 2  | 1  | 2  | 11        |
| Barugola et al <sup>18</sup>     | 2       | 2 | 0 | 2 | 0 | 1 | 0 | 0 | 2 | 2  | 1  | 2  | 14        |
| Katz et al <sup>19</sup>         | 2       | 1 | 0 | 2 | 0 | 2 | 0 | 0 | 2 | 2  | 0  | 2  | 13        |
| Barbier et al <sup>20</sup>      | 1       | 2 | 0 | 2 | 0 | 1 | 0 | 0 | 1 | 2  | 1  | 2  | 12        |
| Sahora et al <sup>21</sup>       | 1       | 2 | 2 | 2 | 0 | 1 | 1 | 0 | 2 | 2  | 0  | 2  | 15        |
| Greer et al <sup>22</sup>        | 1       | 2 | 0 | 2 | 0 | 2 | 0 | 0 | 2 | 2  | 0  | 2  | 13        |
| Massucco et al <sup>23</sup>     | 1       | 2 | 0 | 2 | 0 | 2 | 0 | 0 | 2 | 2  | 0  | 2  | 13        |
| Moutardier et al <sup>24</sup>   | 1       | 2 | 0 | 2 | 0 | 1 | 0 | 0 | 2 | 2  | 1  | 2  | 13        |
| Pingpank et al <sup>25</sup>     | 2       | 1 | 0 | 2 | 0 | 2 | 0 | 0 | 2 | 2  | 0  | 2  | 13        |

A)MINORS.

| Author                         | Random Sequence Generation | Allocation concealment | Selective reporting | Blinding (Participants and Personnel) | Blinding (Outcome) | Incomplete outcome data | Other sources of bias |
|--------------------------------|----------------------------|------------------------|---------------------|---------------------------------------|--------------------|-------------------------|-----------------------|
| Versteijne et al <sup>26</sup> | Low                        | U                      | Low                 | High                                  | High               | Low                     | U                     |
| Golcher et al <sup>12</sup>    | U                          | U                      | Low                 | High                                  | High               | Low                     | Low                   |
| Jang et al <sup>6</sup>        | Low                        | U                      | Low                 | High                                  | High               | Low                     | U                     |

B) Cochran's Risk of bias tool *Item 1* Clear aim, *Item 2* consecutive patients, *Item 3* prospective data collection, *Item 4* appropriate end points, *Item 5* unbiased assessment, *Item 6* appropriate follow-up, *Item 7* insignificant lost to follow-up, *Item 8* power calculation, *Item 9* appropriate control, *Item 10* Contemporary cohorts, *Item 11* Equivalent baseline characteristics, *Item 12* appropriate statistical analysis. *High* High risk of bias, *Low* Low risk of bias, *U* Unclear risk of bias.<sup>2-25</sup>.

### A) Locoregional recurrence

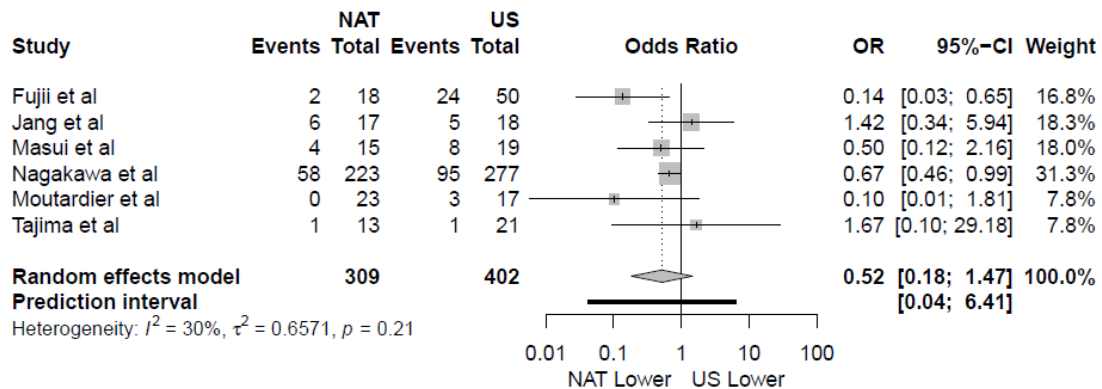

### B) Distant recurrence

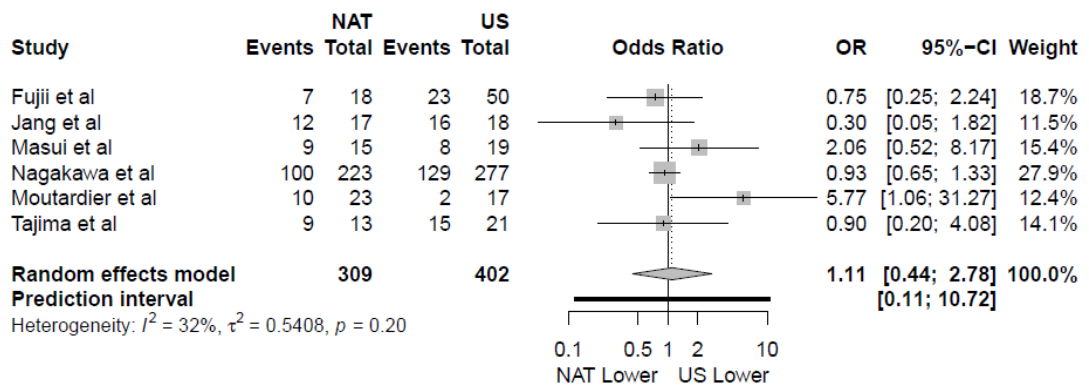

**Figure S1.** Forest plot showing rate of locoregional (A) and distant (B) recurrence in studies reporting solely either borderline resectable (BRPC) or resectable (RPC) pancreatic cancer for Neoadjuvant therapy (NAT) vs Up-front Surgery (US). A Manel-Haenszel random effects model with a Hartung-Knapp adjustment was used for the meta-analysis of all outcomes. A Sidik-Jonkman estimator was utilised for  $\tau^2$ . Odds ratios (OR) are shown with 95 percent confidence intervals (CI).

### A) Two-Year Recurrence-Free Survival

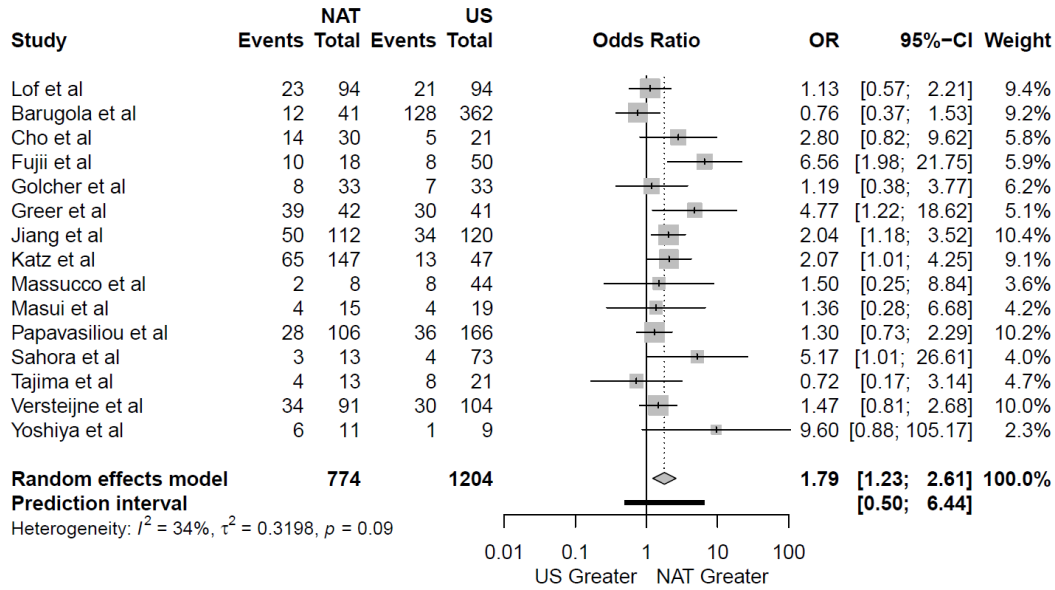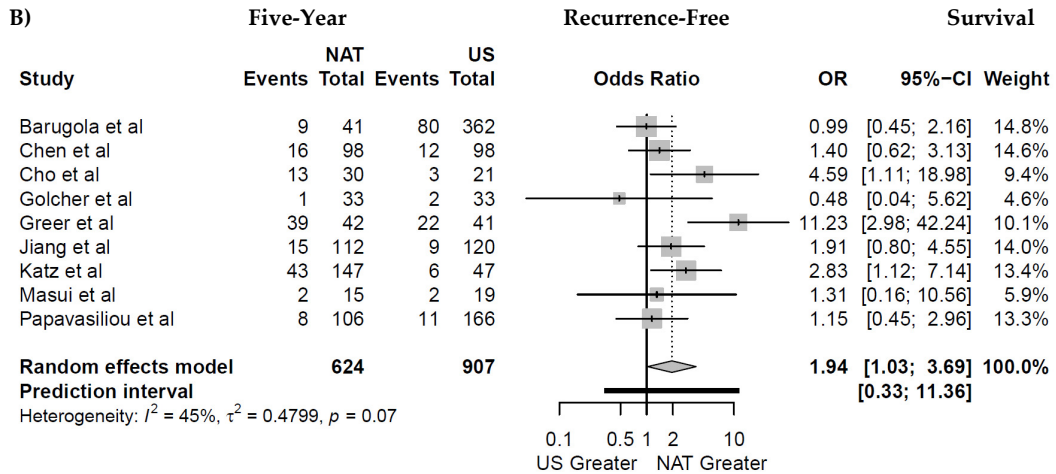

**Figure S2.** Forest plot showing recurrence-free survival at A) 2-years and B) 5-years postoperatively following Neoadjuvant therapy (NAT) vs Up-front Surgery (US). A Manel–Haenszel random effects model with a Hartung–Knapp adjustment was used for the meta-analysis of all outcomes. A Sidik–Jonkman estimator was utilised for  $\tau^2$ . Odds ratios (OR) are shown with 95 percent confidence intervals (CI).

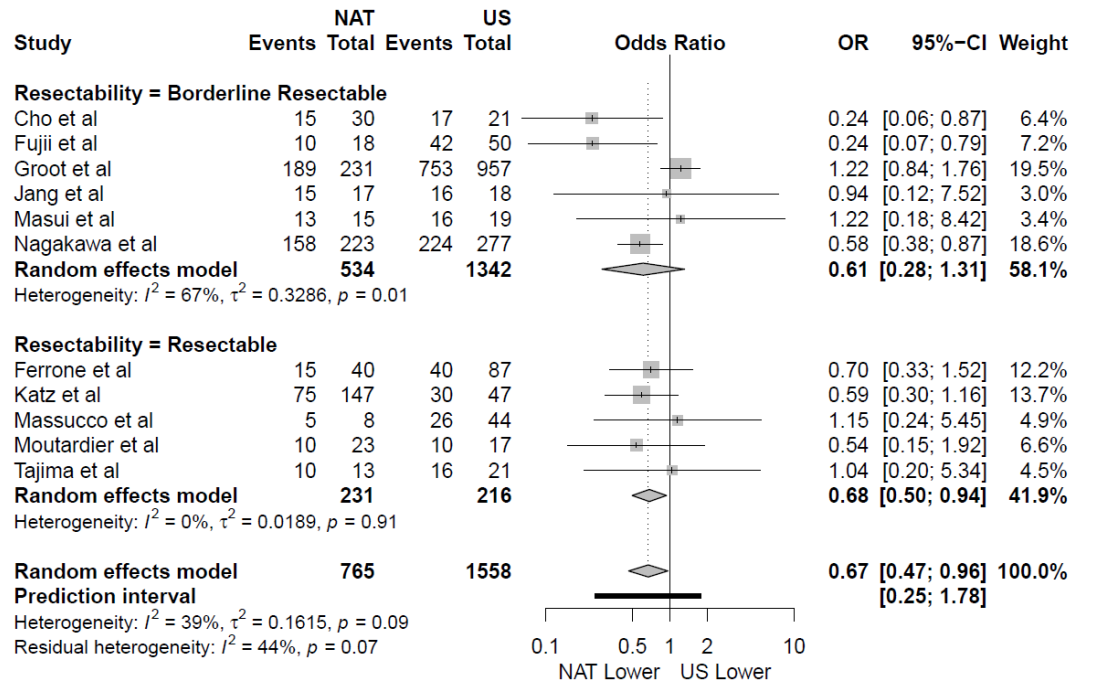

A) Resectability

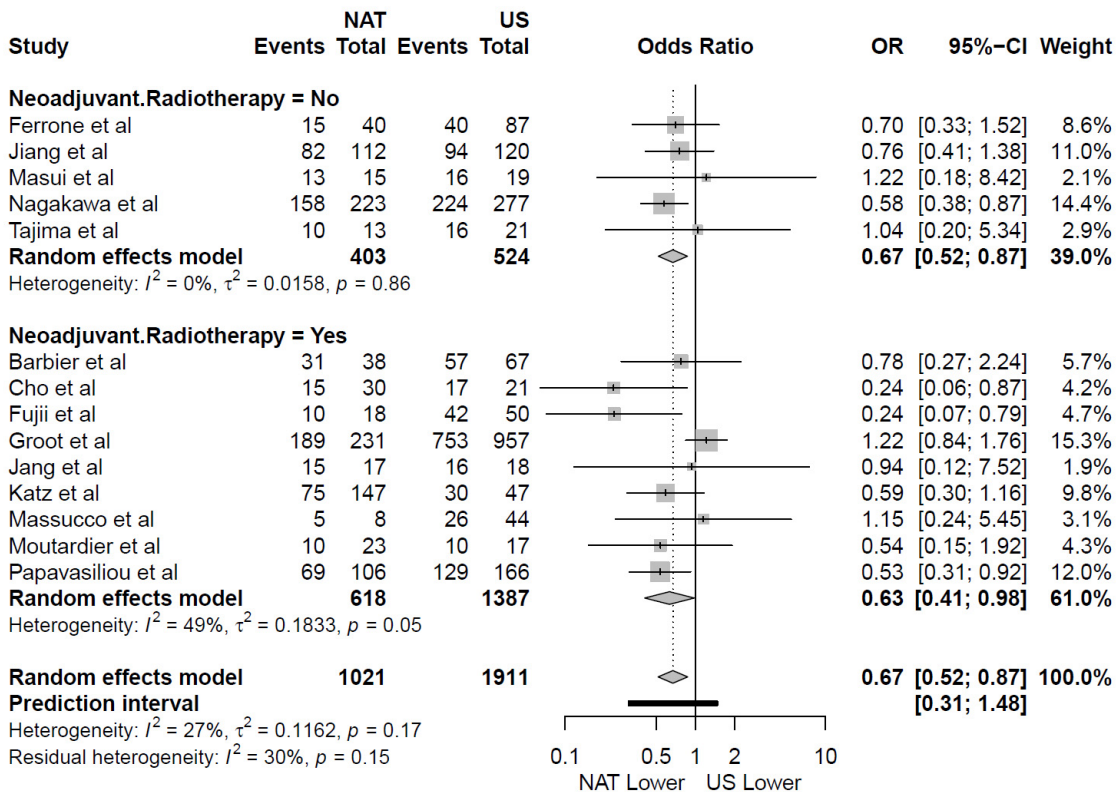

B) Preoperative chemoradiotherapy

**Figure S3.** Forest plot showing overall recurrence rates in articles reporting A) preoperative resectability and B) preoperative chemoradiotherapy subgroups following Neoadjuvant therapy (NAT) vs Up-front Surgery (US). A Manel-Haenszel random effects model with a Hartung-Knapp adjustment was used

for the meta-analysis of all outcomes. A Sidik-Jonkman estimator was utilised for tau<sup>2</sup>. Odds ratios (OR) are shown with 95 percent confidence intervals (CI).

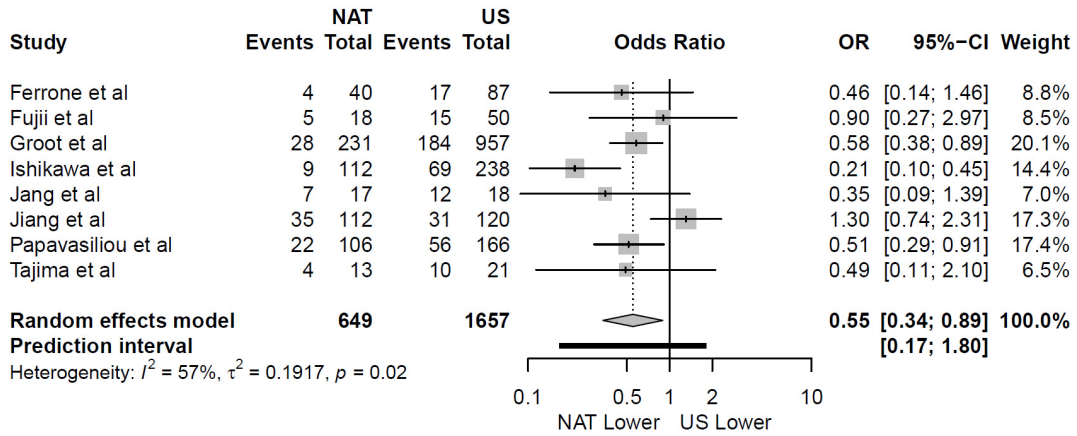

A) Liver Recurrence.

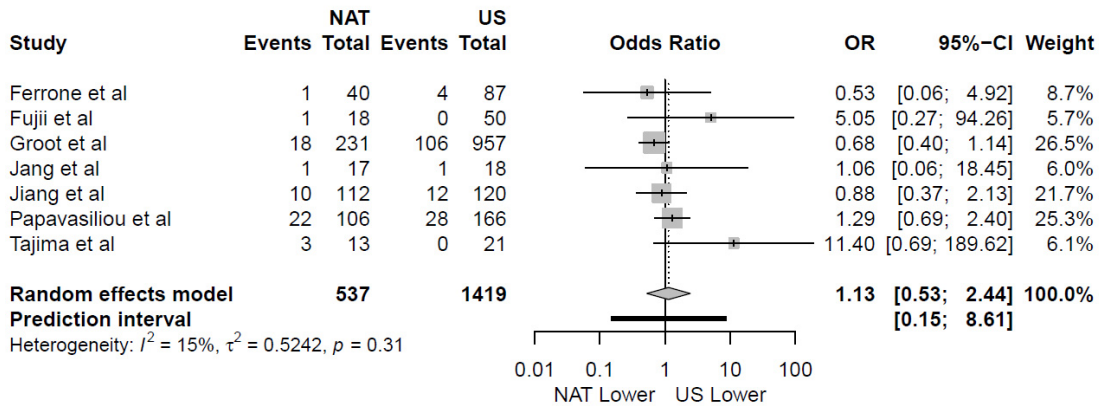

B) Lung Recurrence.

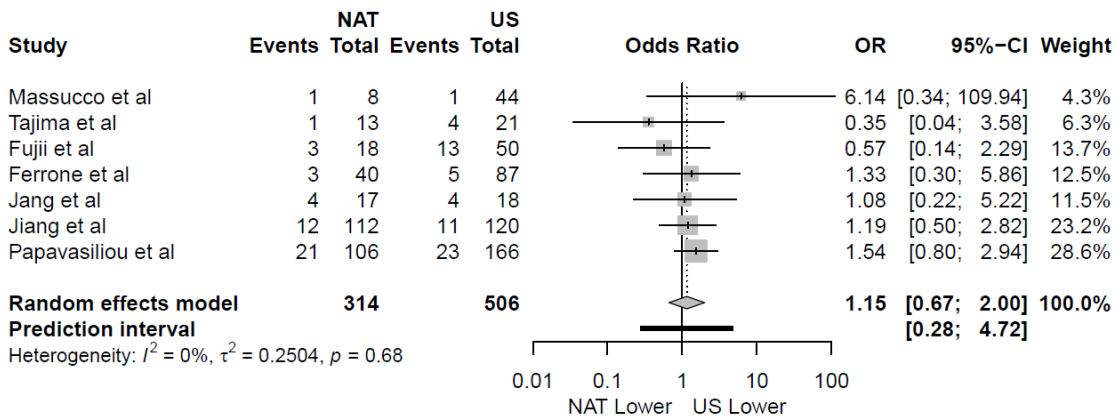

C) Peritoneal Recurrence.

**Figure S4.** Forest plot showing A) Liver, B) Lung and B) Peritoneal recurrence rates following Neoadjuvant therapy (NAT) vs Up-front Surgery (US). A Manel-Haenszel random effects model with



a Hartung–Knapp adjustment was used for the meta-analysis of all outcomes. A Sidik–Jonkman estimator was utilised for tau<sup>2</sup>. Odds ratios (OR) are shown with 95 percent confidence intervals (CI).

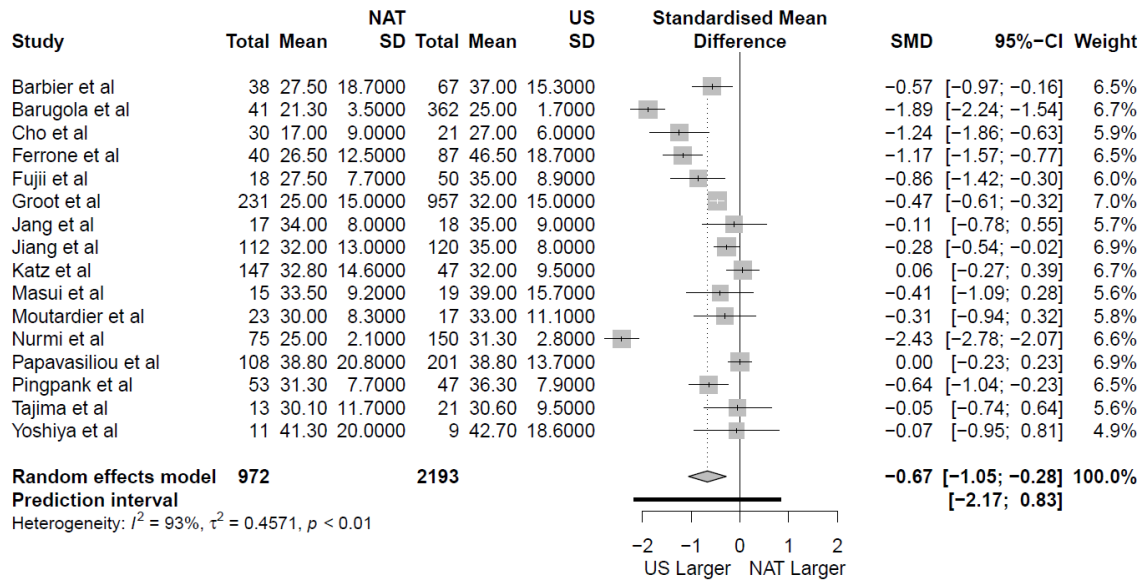

**Figure S5.** Forest plot showing mean tumor diameter in mm following Neoadjuvant therapy (NAT) vs Up-front Surgery (US). A Manel–Haenszel random effects model with a Hartung–Knapp adjustment was used for the meta-analysis of all outcomes. A Sidik–Jonkman estimator was utilised for tau<sup>2</sup>. Standard Mean Differences (SMD) are shown with 95 percent confidence intervals.

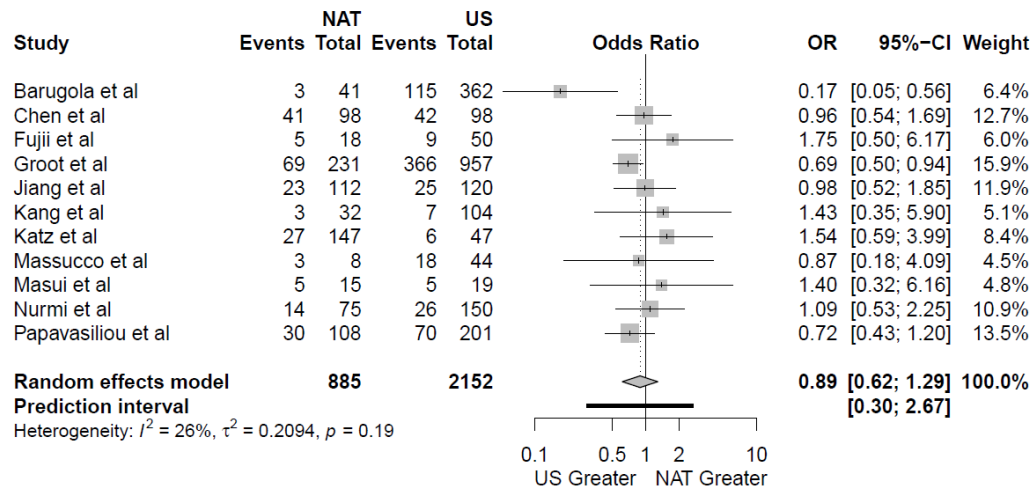

**A) Poor Tumor Differentiation.**

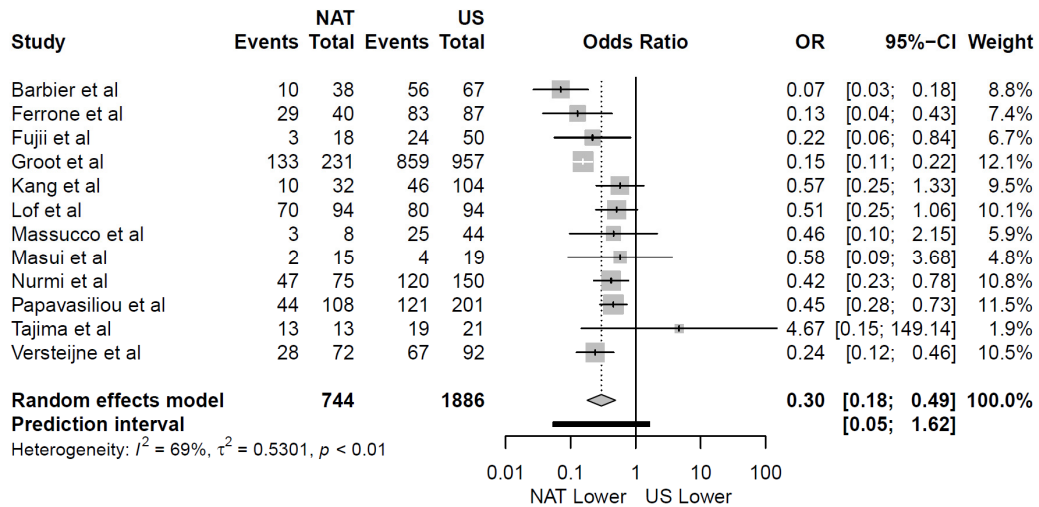

### B) Perineural Involvement.

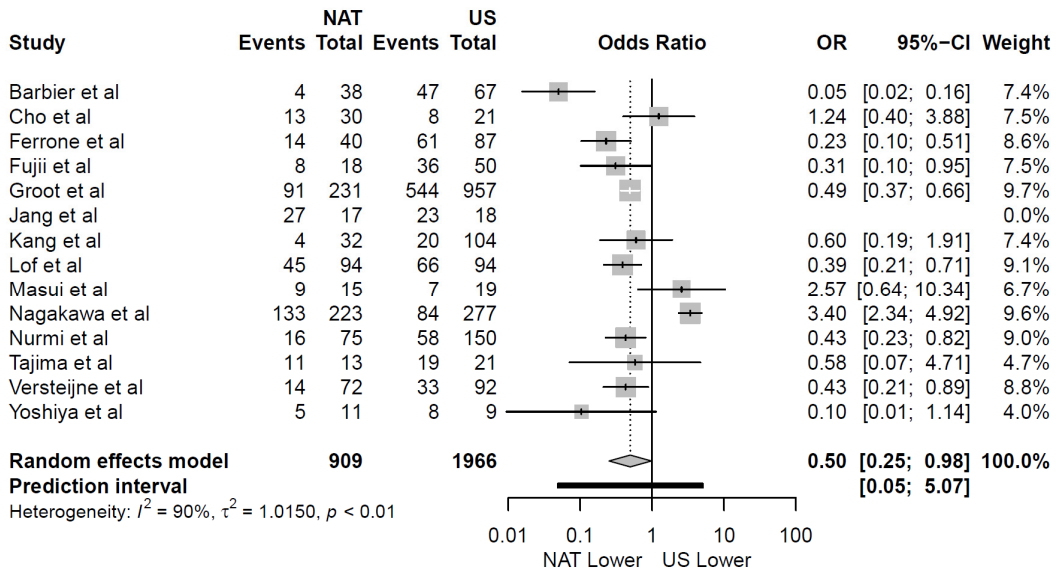

### C) Lymphovascular Involvement.

**Figure S6.** Forest plot showing A) Poor Tumor differentiation at the time of surgery B) perineural and A) Lymphovascular involvement rates following Neoadjuvant therapy (NAT) vs Up-front Surgery (US). A Manel-Haenszel random effects model with a Hartung-Knapp adjustment was used for the meta-analysis of all outcomes. A Sidik-Jonkman estimator was utilised for tau<sup>2</sup>. Odds ratios (OR) are shown with 95 percent confidence intervals (CI).

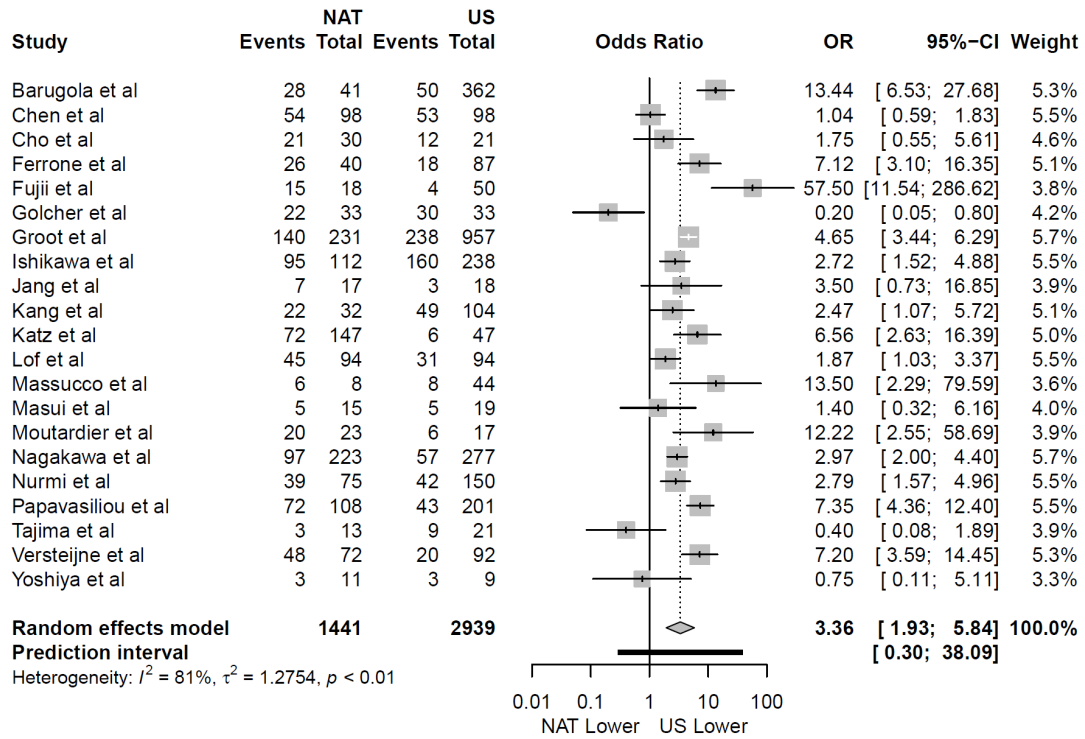

A) N0 Nodal Status.

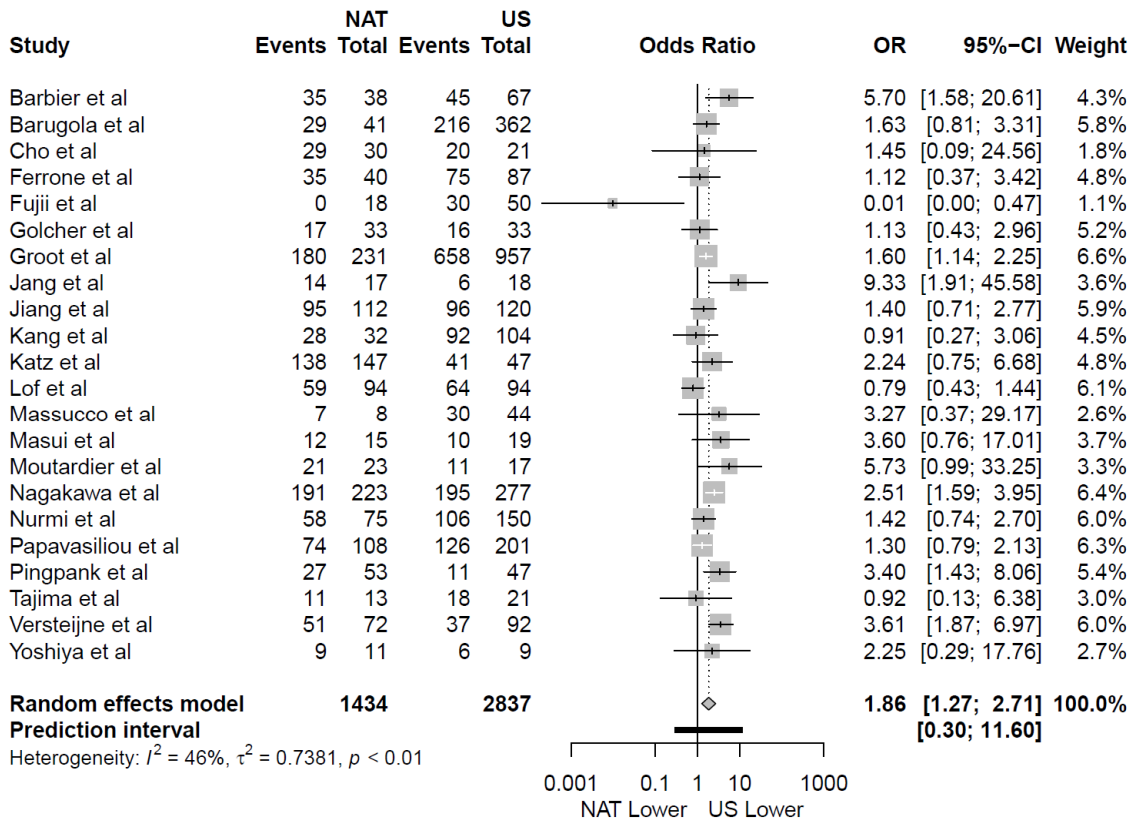

B) R0 Resection.

**Figure S7.** Forest plot showing A) N0 Status and B) R0 Resection rates following Neoadjuvant therapy (NAT) vs Up-front Surgery (US). A Manel-Haenszel random effects model with a Hartung-Knapp adjustment was used for the meta-analysis of all outcomes. A Sidik-Jonkman estimator was utilised for  $\tau^2$ . Odds ratios (OR) are shown with 95 percent confidence intervals (CI).

Tumor diameter

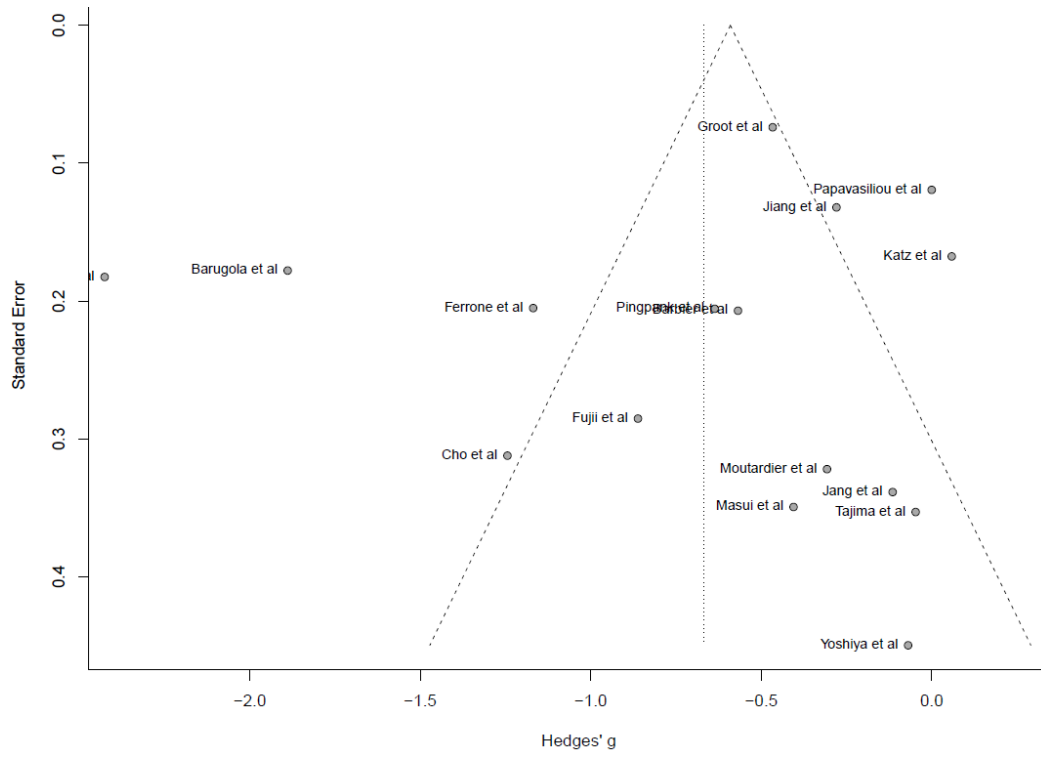

A) N0 nodal status

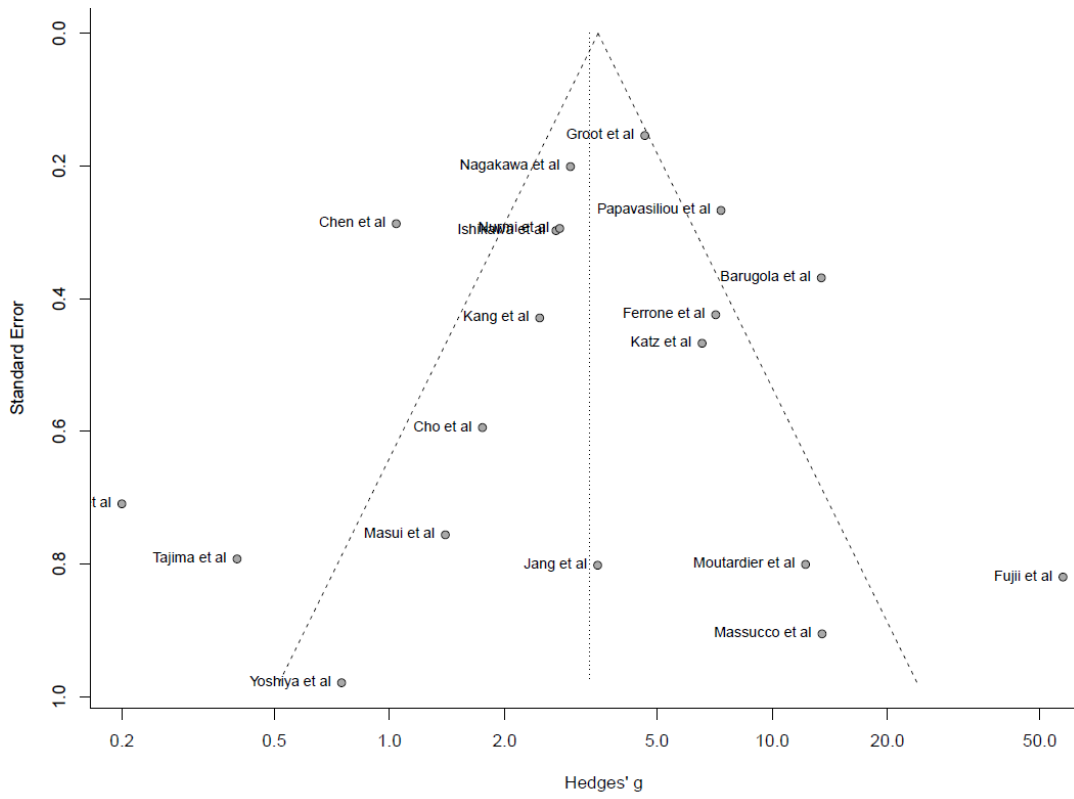

B) Poor tumor differentiation

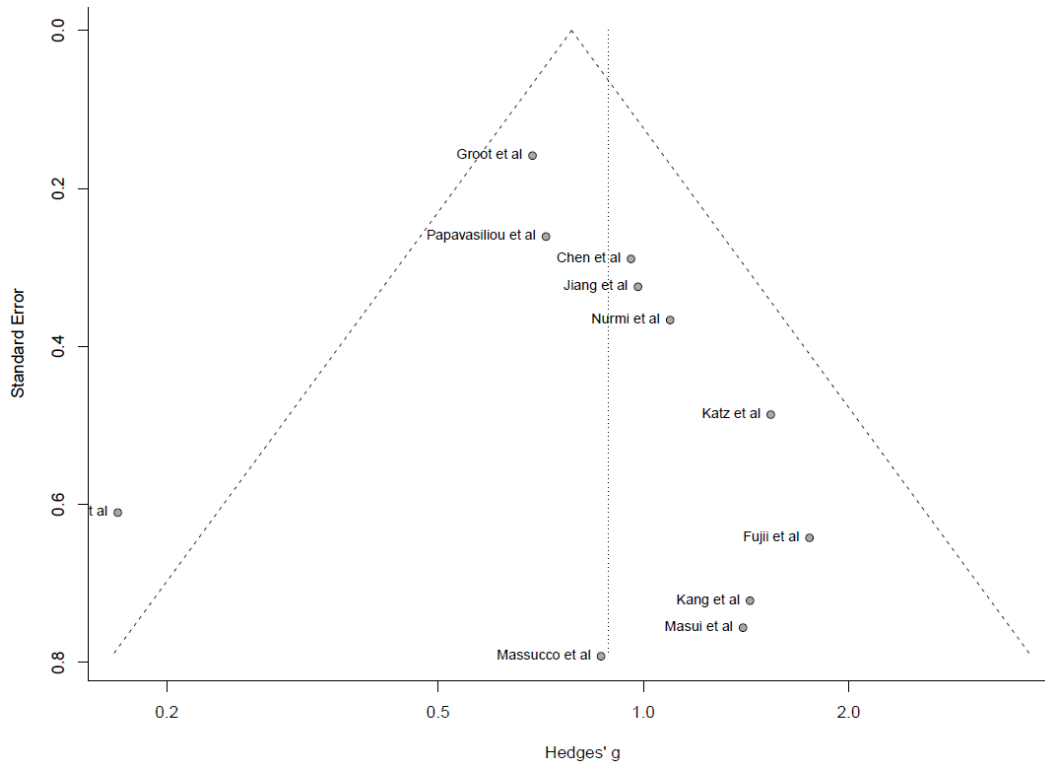

C) Perineural invasion

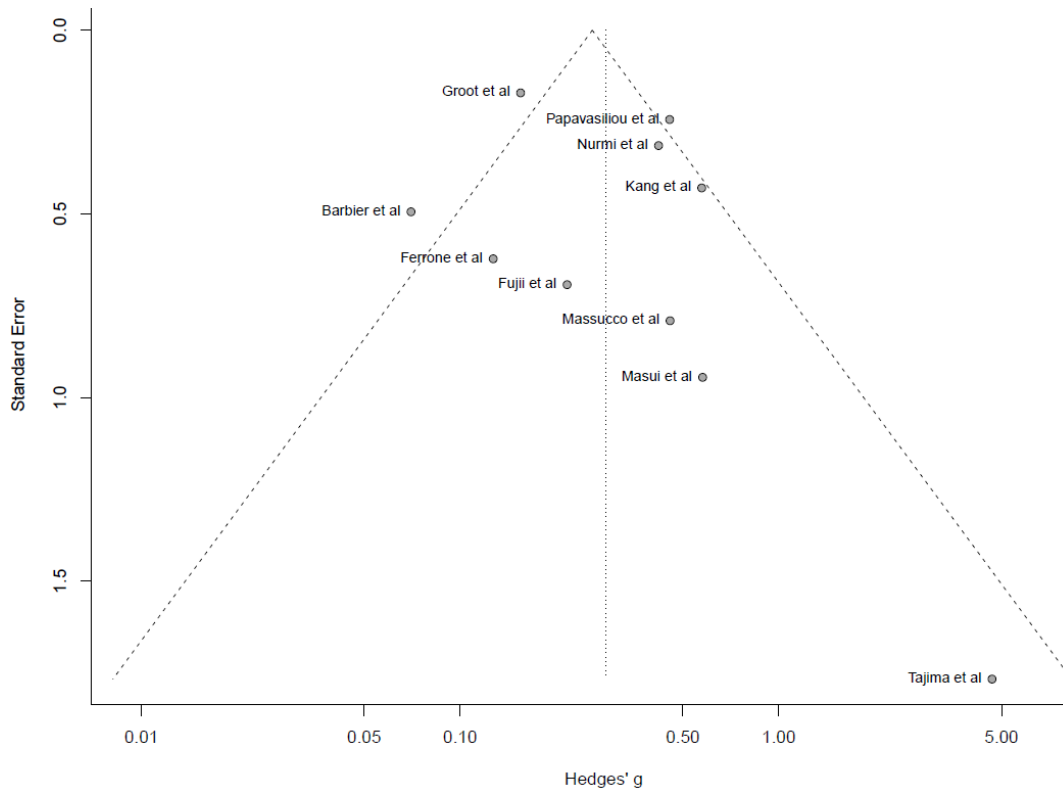

D) Lymphovascular invasion

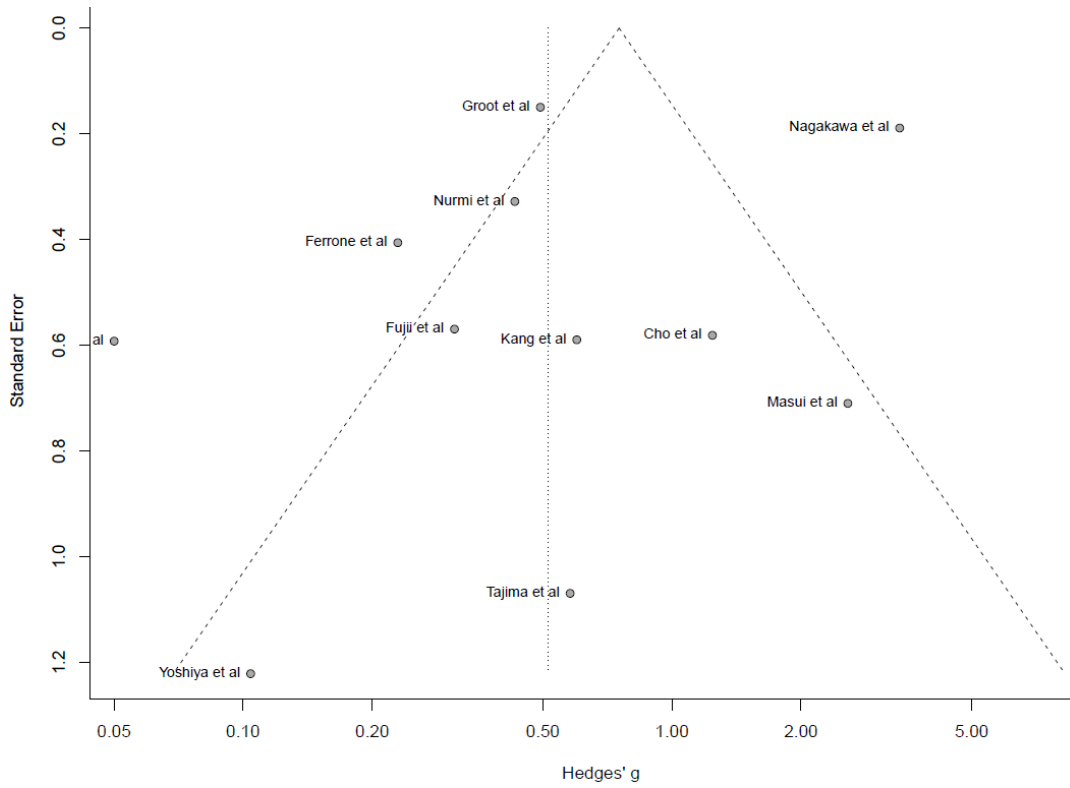

E) R0 Resection

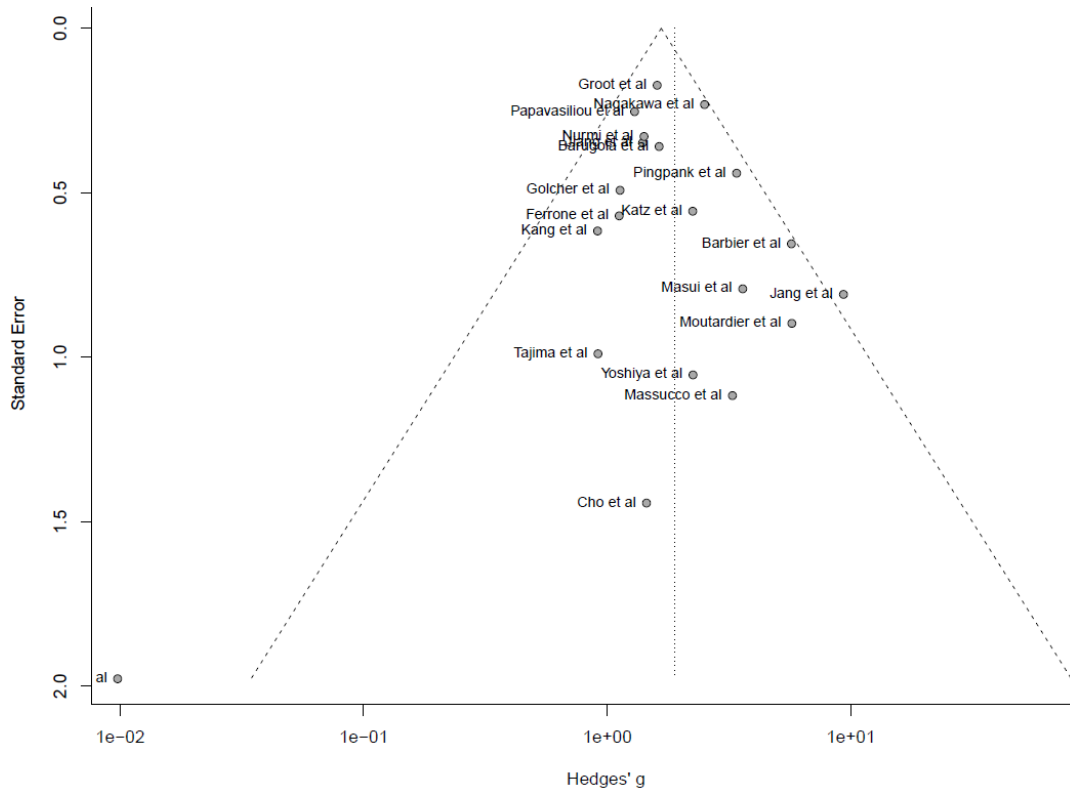

F) Overall Recurrence

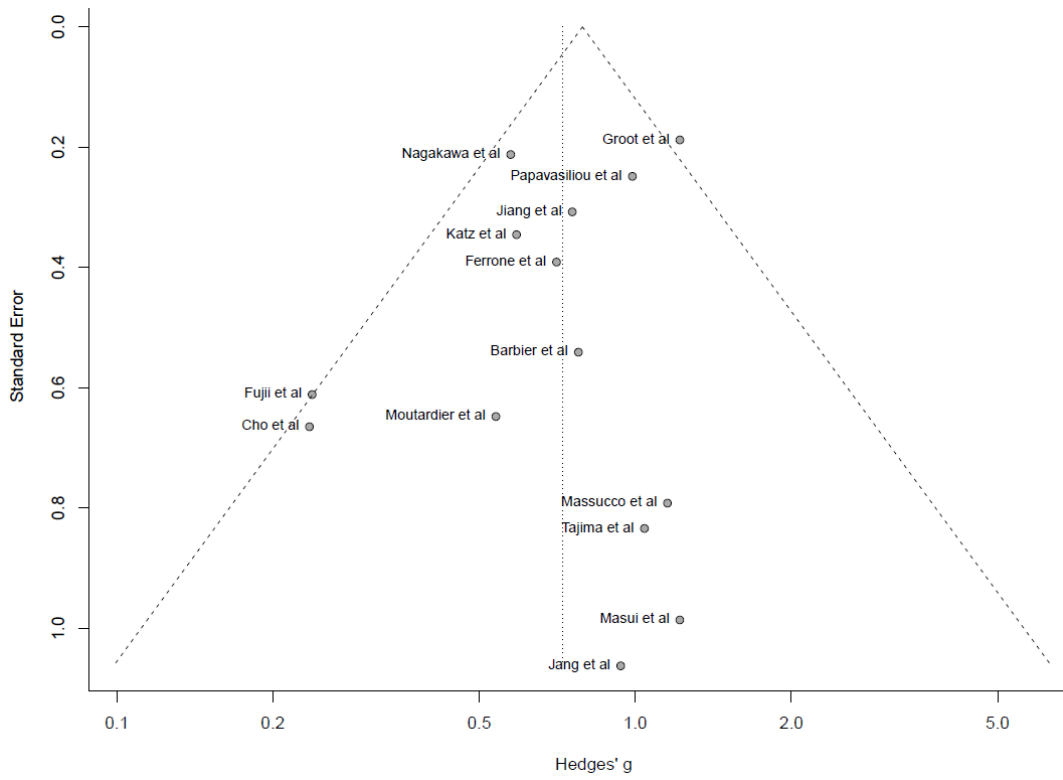

G) Time to first recurrence

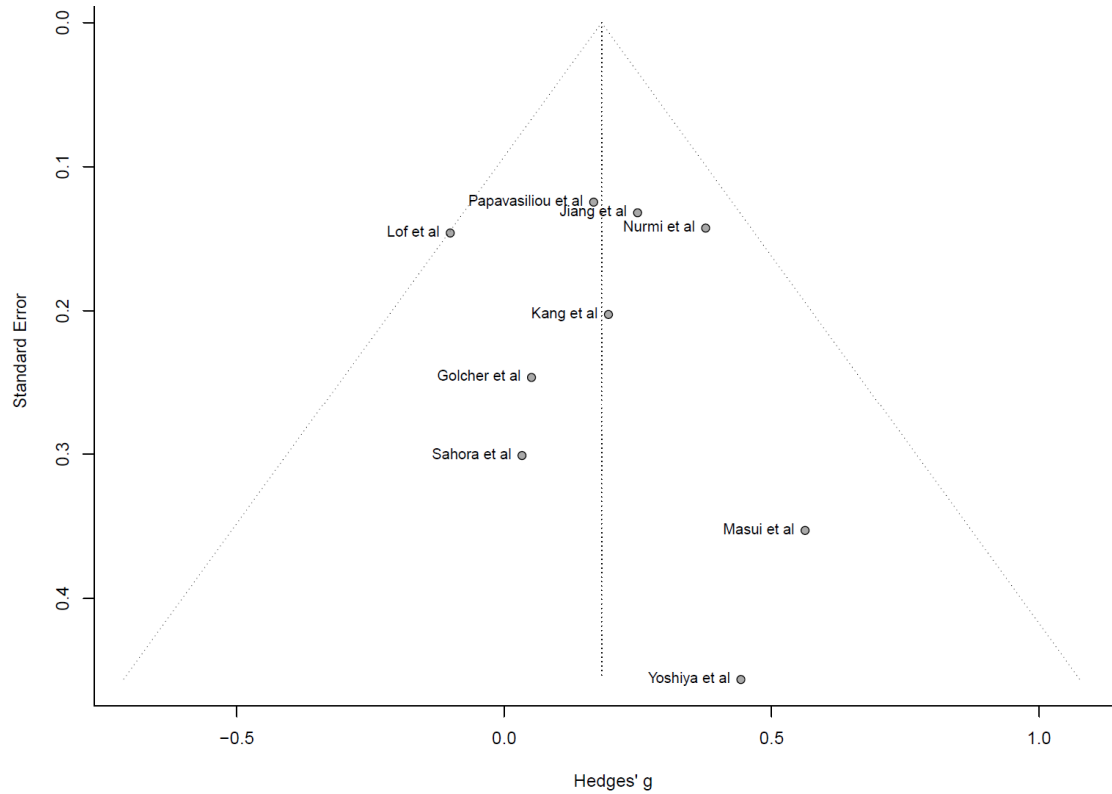



**Figure S8.** Funnel plots for all meta-analysis outcomes including A) Tumor Size, B) N0 Nodal Status, C) Poor tumor differentiation, D) Perineural invasion, E) Lymphovascular invasion, F) R0 Resection, G) Overall recurrence, and H) Recurrence-free survival.
